# Supplementary material for: CP-673451, a Selective Platelet-Derived Growth Factor Receptor Tyrosine Kinase Inhibitor, Induces Apoptosis in Opisthorchis viverrini-Associated Cholangiocarcinoma via Nrf2 Suppression and Enhanced ROS
Source: MDPI journal article supplement (doi:10.3390/ph17010009), 2023-12-20
Supplement: s1 [file s1]

**S1 Table.** Correlation of PDGFR and PDGF mRNA expression

| Gene           | <i>p</i> -value |                |        |        |        |
|----------------|-----------------|----------------|--------|--------|--------|
|                | PDGFR- $\alpha$ | PDGFR- $\beta$ | PDGF-A | PDGF-B | PDGF-C |
| PDGFR- $\beta$ | <0.0001         | -              | -      | -      | -      |
| PDGF-A         | 0.1707          | 0.8668         | -      | -      | -      |
| PDGF-B         | 0.0013          | 0.0119         | 0.0216 | -      | -      |
| PDGF-C         | 0.7437          | 0.662          | 0.0272 | 0.4896 | -      |
| PDGF-D         | 0.046           | 0.0018         | 0.9191 | 0.0457 | 0.5617 |

 Positive correlation

**S2 Table.** Correlation of high PDGFR expression and clinicopathological parameters

| Location and Marker                       | Parameter        | No. of Patient | <i>P</i> -value |
|-------------------------------------------|------------------|----------------|-----------------|
| Tumor:<br>High PDGFR- $\alpha$ expression | Tumor stages     |                |                 |
|                                           | I & II           | 10             | 0.0142          |
|                                           | III & IV         | 9              |                 |
|                                           | Tumor size       |                |                 |
|                                           | Size < 5 cm      | 6              | 0.0030          |
|                                           | Size $\geq$ 5 cm | 20             |                 |
| CAFs:<br>High PDGFR- $\beta$ expression   | Tumor stages     |                |                 |
|                                           | I & II           | 10             | 0.0251          |
|                                           | III & IV         | 11             |                 |

**S3 Table.** Relationship between the PDGFR protein expression and IC<sub>50</sub> of PDGFR inhibitors.

| Expression      |                 | IC <sub>50</sub> of PDGFR inhibitors |           |           |
|-----------------|-----------------|--------------------------------------|-----------|-----------|
|                 |                 | Imatinib                             | Sunitinib | CP-673451 |
| PDGFR- $\alpha$ | <i>p</i> -value | 0.9196                               | 0.5657    | 0.1719    |
| PDGFR- $\beta$  | <i>p</i> -value | 0.5008                               | 0.1194    | 0.3478    |

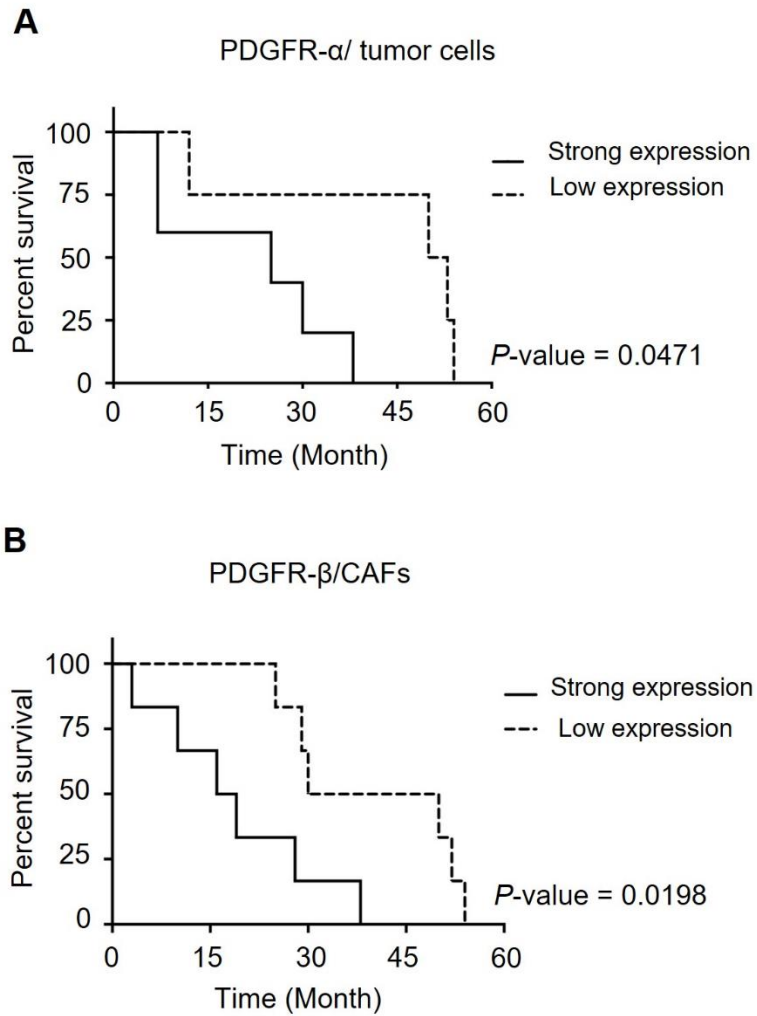

**S1 Fig.** Kaplan-Meier survival analysis of CCA patients according to IHC level of (A) PDGFR- $\alpha$  expression in tumor and (B) PDGFR- $\beta$  expression in CAFs, analyzed by Log-rank (Mantel-Cox) test.
